# Supplementary material for: Defining substrate requirements for cleavage of farnesylated prelamin A by the integral membrane zinc metalloprotease ZMPSTE24
Source: PubMed Central journal article supplement (PMC7735620; doi:10.1371/journal.pone.0239269), 2020-12-14
Supplement: pone.0239269.s003.pdf [file pone.0239269.s003.pdf]

Fig. 2B

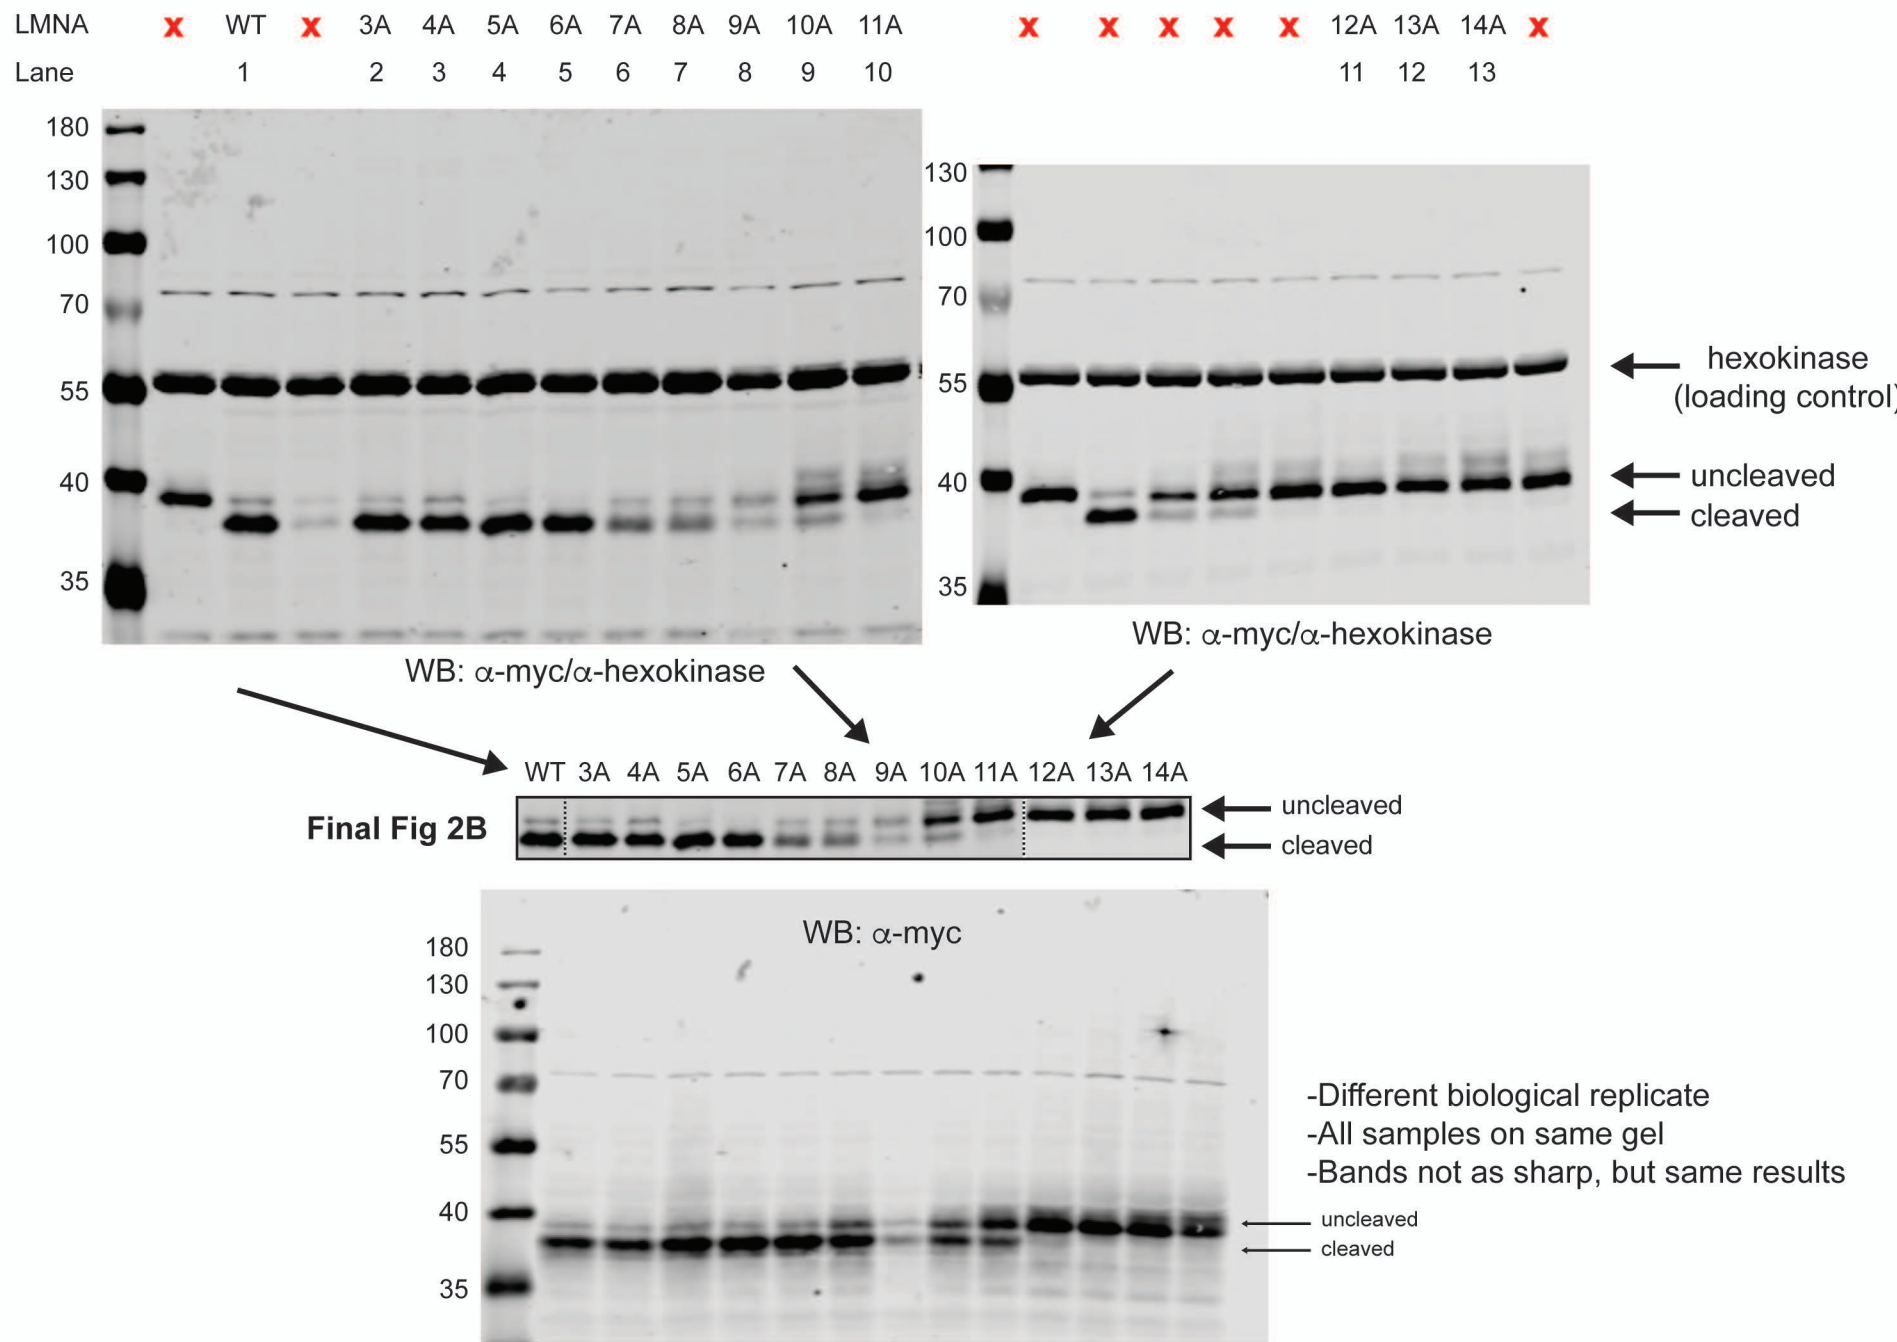

- SDS detergent lysates from strain SM6303 (*ste24Δ HA-ZMPSTE24*) transformed with myc-prelamin A plasmids were resolved by 10% SDS-PAGE, transferred to nitrocellulose (Biorad TransBlot Turbo), and proteins were detected using anti-myc monoclonal antibody and rabbit anti-hexokinase polyclonal antibody (described in M&Ms). Proteins were detected using Licor secondary antibodies and visualized using the Odyssey imaging platform (Licor). Some LMNA mutants show lower steady-state levels (lanes 6-8). This has also been observed for other LMNA mutants.

Fig. 3B

**A**

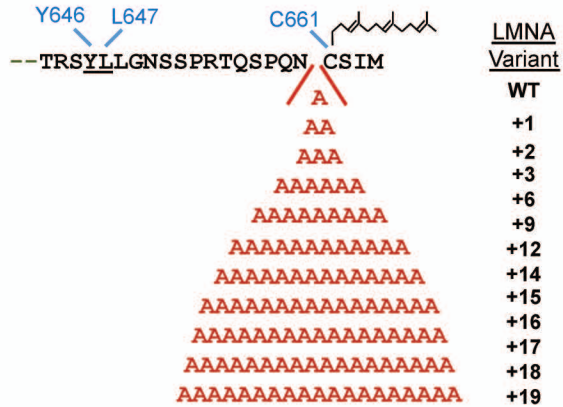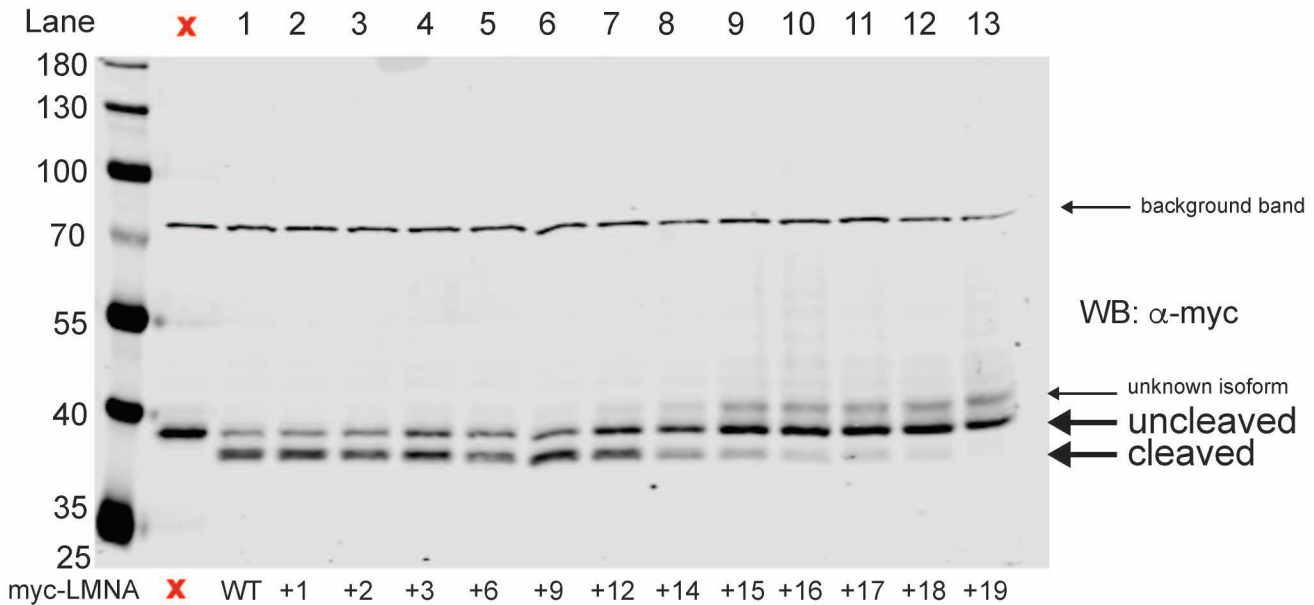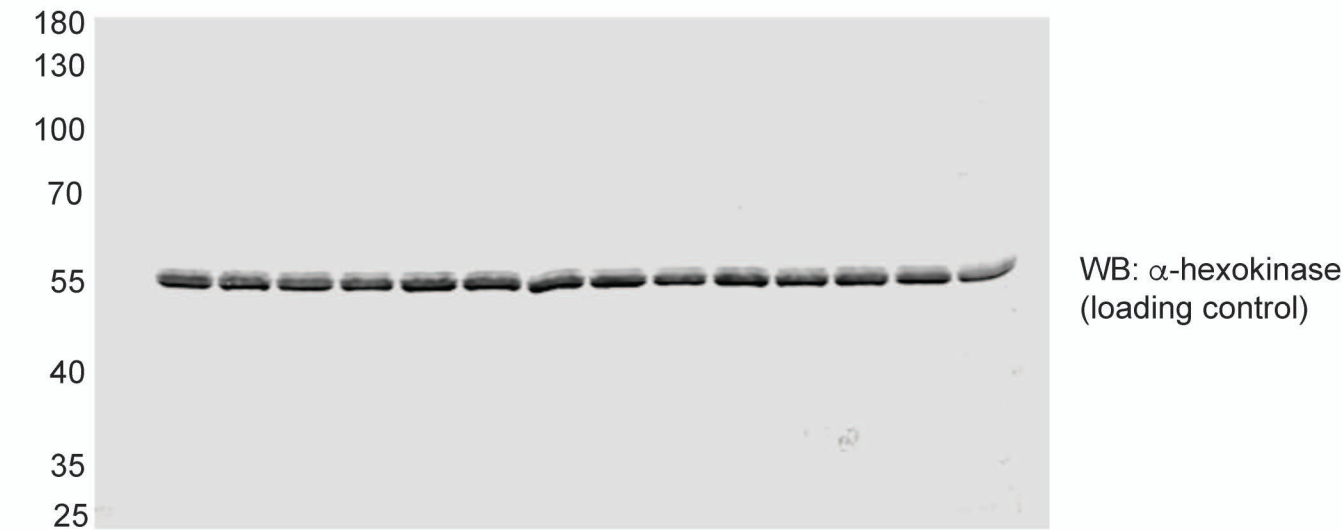

- SDS detergent lysates from strain SM6303 (*ste24Δ HA-ZMPSTE24*) transformed with myc-prelamin A plasmids were resolved by 10% SDS-PAGE, transferred to nitrocellulose (Biorad TransBlot Turbo), and proteins were detected using anti-myc monoclonal antibody and anti-hexokinase polyclonal antibody (described in M&Ms). Proteins were detected using Licor anti-mouse and anti-rabbit secondary antibodies and visualized using the Odyssey imaging platform (Licor). The longer alanine extensions (+14-+19) show a slower migrating species of unknown origin.

Fig. 4B

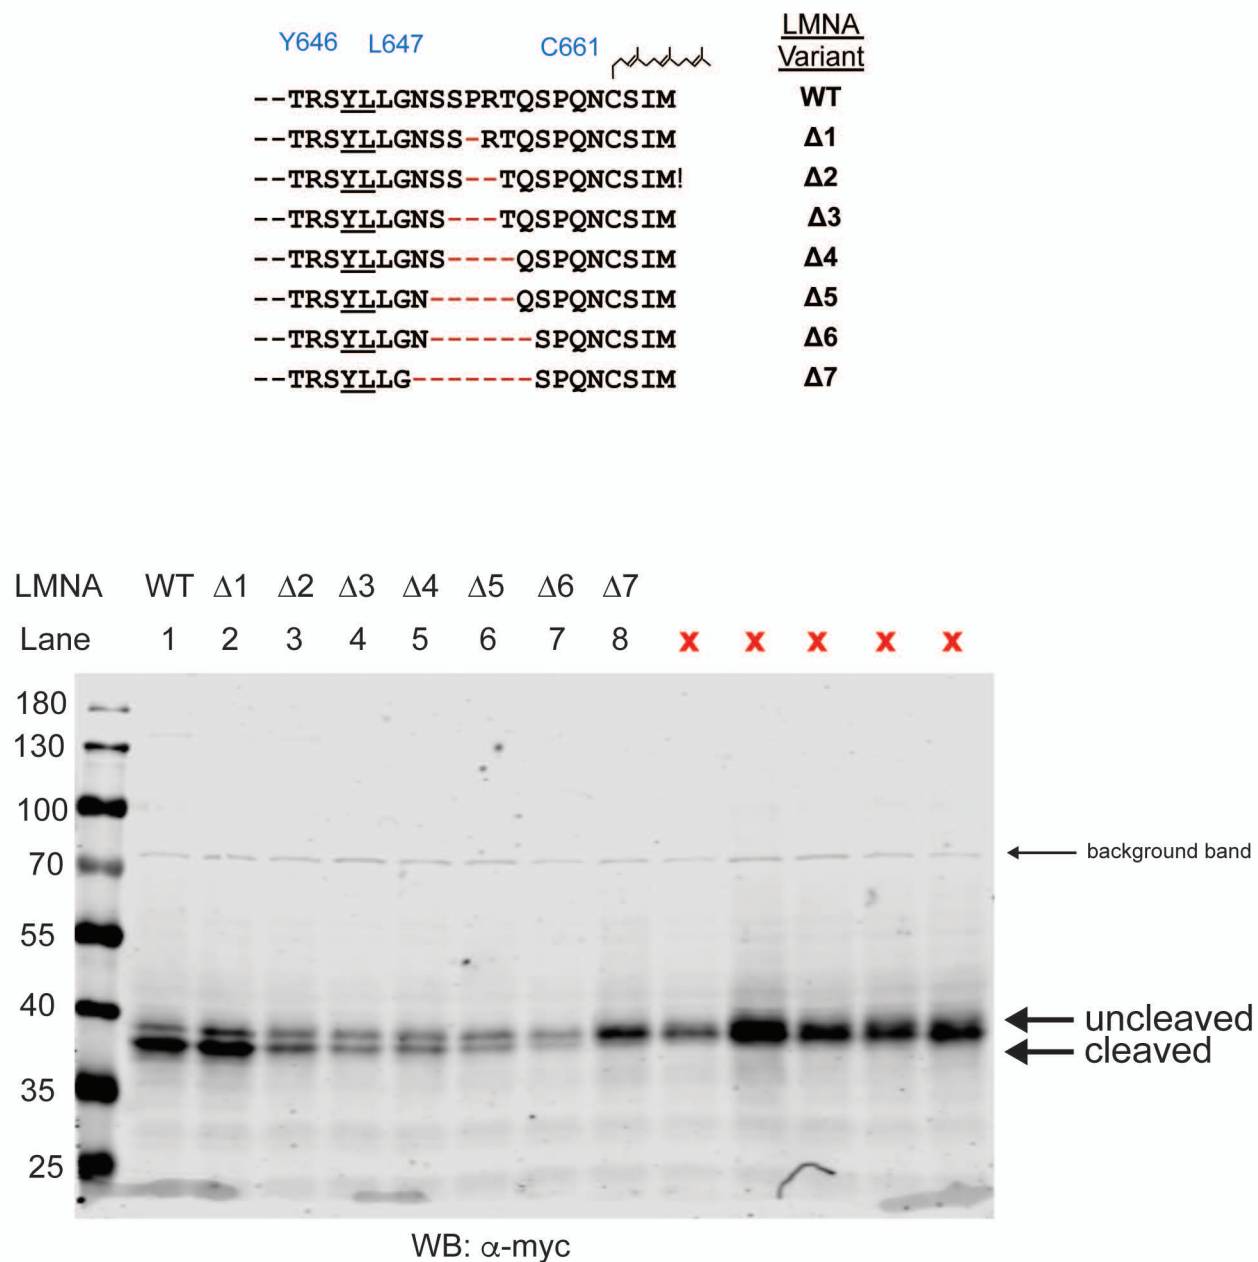

- SDS detergent lysates from strain SM6303 (*ste24Δ HA-ZMPSTE24*) transformed with myc-prelamin A plasmids were resolved by 10% SDS-PAGE, transferred to nitrocellulose (Biorad TransBlot Turbo), and proteins were detected using anti-myc monoclonal antibody (described in M&Ms). Proteins were detected using Licor anti-mouse secondary antibodies and visualized using the Odyssey imaging platform (Licor). Some LMNA mutants show lower steady-state levels (lanes 3-7). This has also been observed in Figure 6B.

Fig. 5B

A

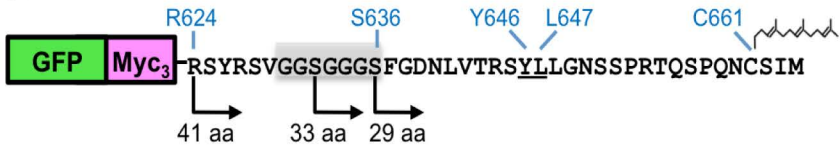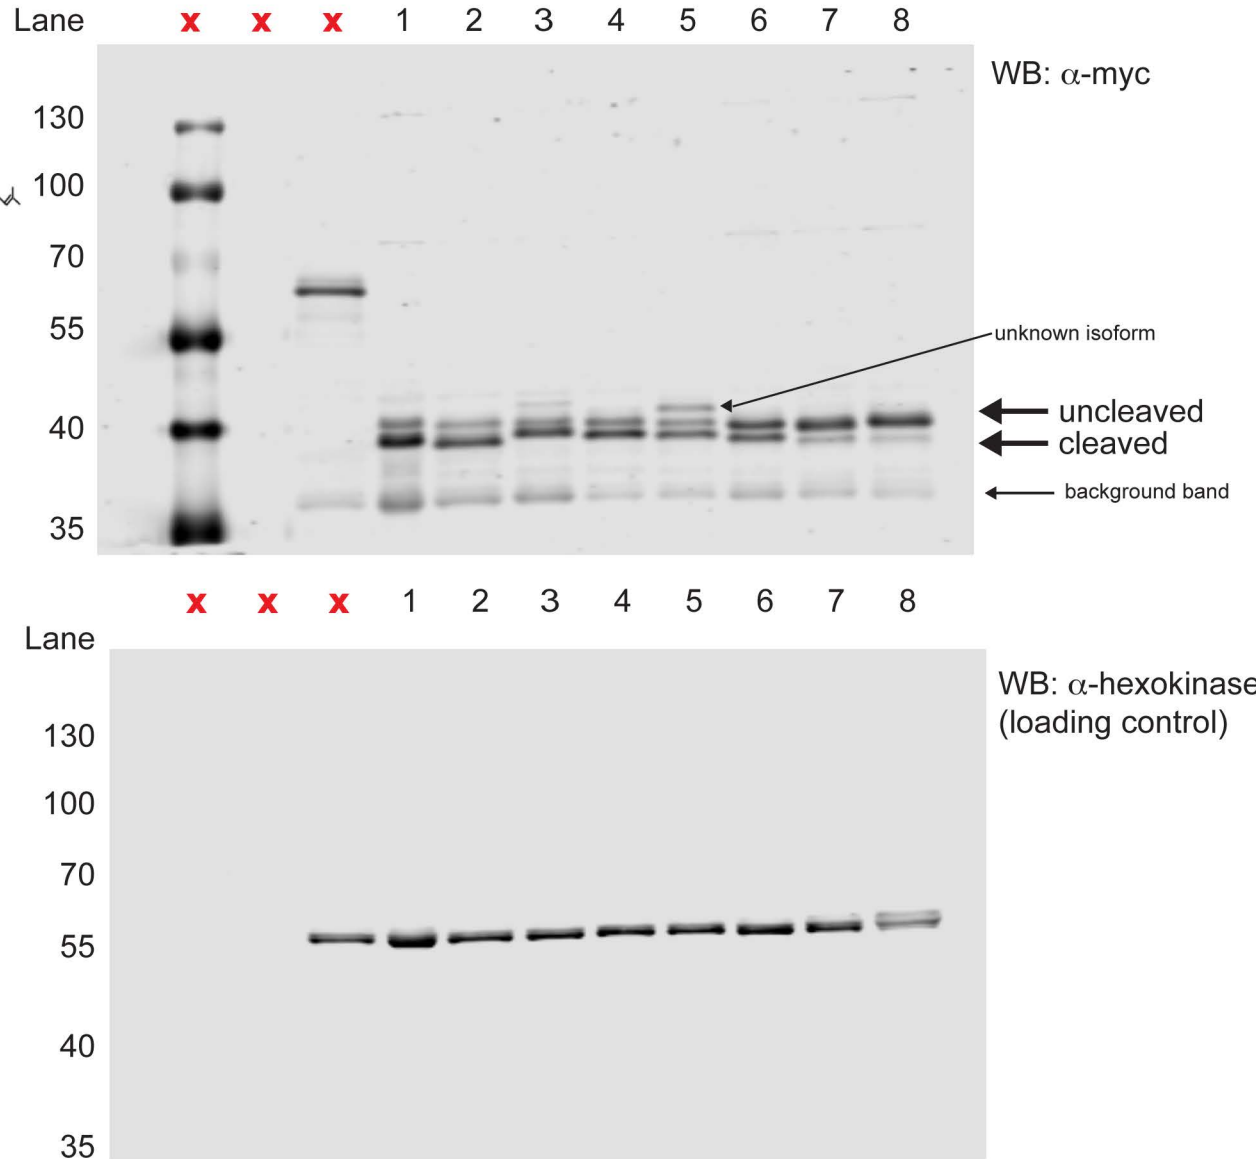

- SDS detergent lysates from strain SM6303 (*ste24Δ HA-ZMPSTE24*) transformed with myc-prelamin A plasmids were resolved by 10% SDS-PAGE, transferred to nitrocellulose (Biorad TransBlot Turbo), and proteins were detected using anti-myc monoclonal antibody and anti-hexokinase polyclonal antibody (described in M&Ms). Proteins were detected using Licor anti-mouse and anti-rabbit secondary antibodies and visualized using the Odyssey imaging platform (Licor). The longer alanine extensions (+14-+19) show a slower migrating species of unknown origin.

Fig. 5D

C

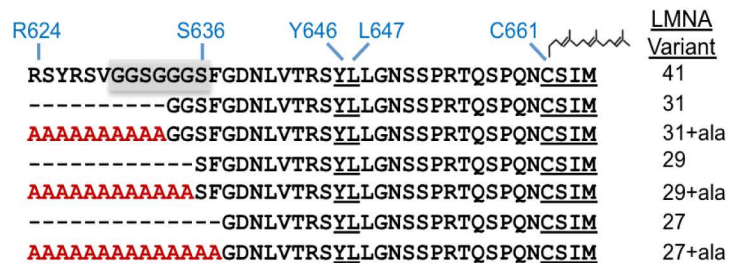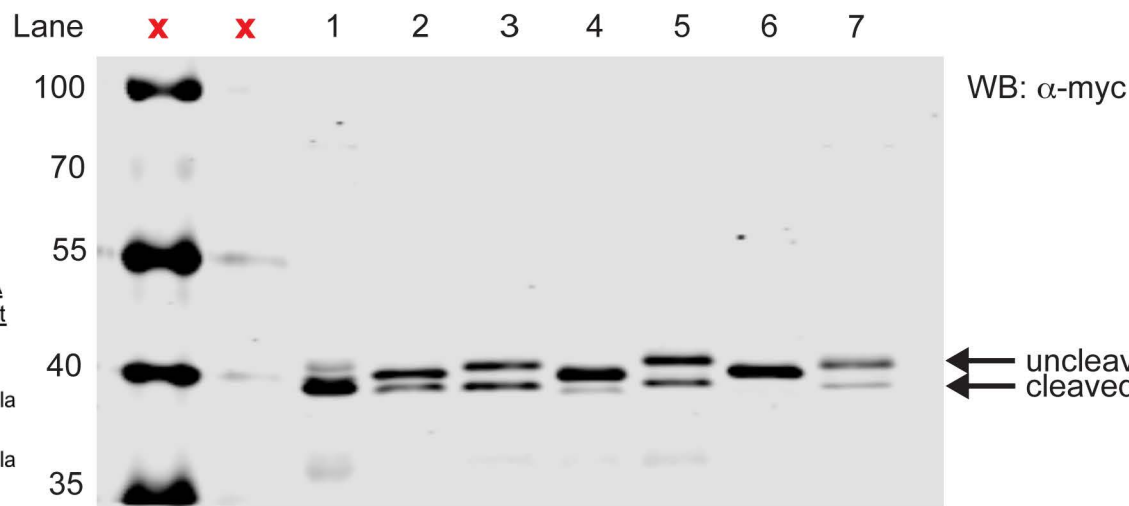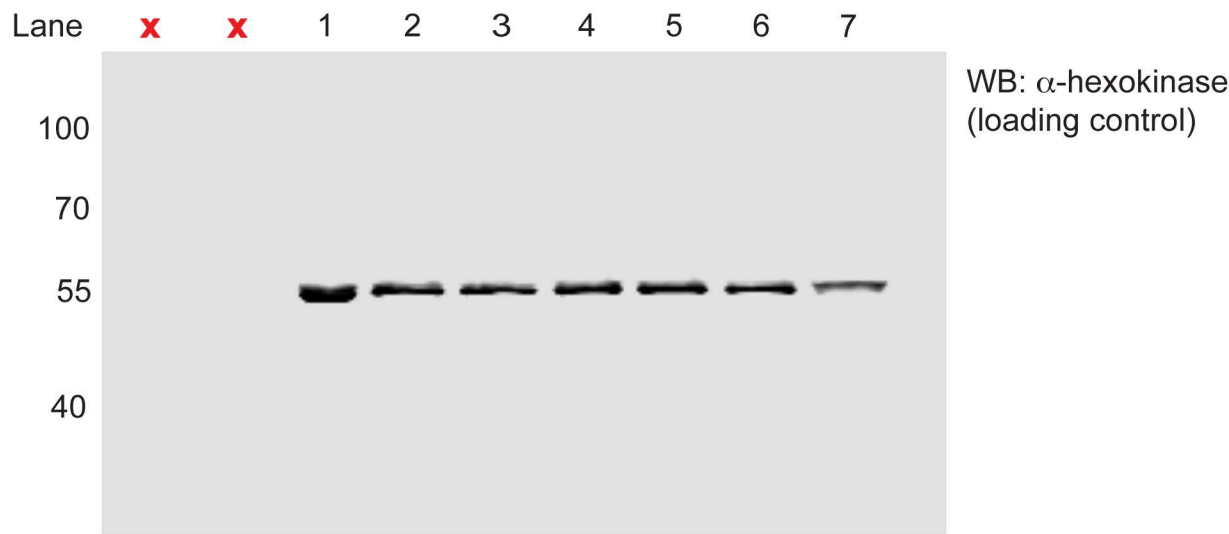

- SDS detergent lysates from strain SM6303 (*ste24 $\Delta$  HA-ZMPSTE24*) transformed with myc-prelamin A plasmids were resolved by 10% SDS-PAGE, transferred to nitrocellulose (Biorad TransBlot Turbo), and proteins were detected using anti-myc monoclonal antibody and anti-hexokinase polyclonal antibody (described in M&Ms). Proteins were detected using Licor anti-mouse and anti-rabbit secondary antibodies and visualized using the Odyssey imaging platform (Licor). The longer alanine extensions (+14-+19) show a slower migrating species of unknown origin.

Fig. 6B

A

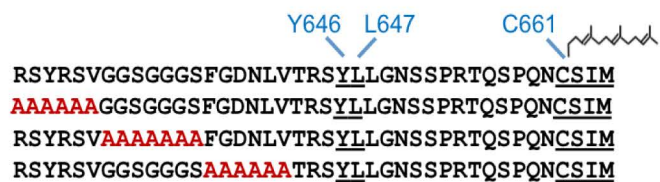

LMNA  
 Variant  
 WT  
 624-629  
 630-636  
 637-642

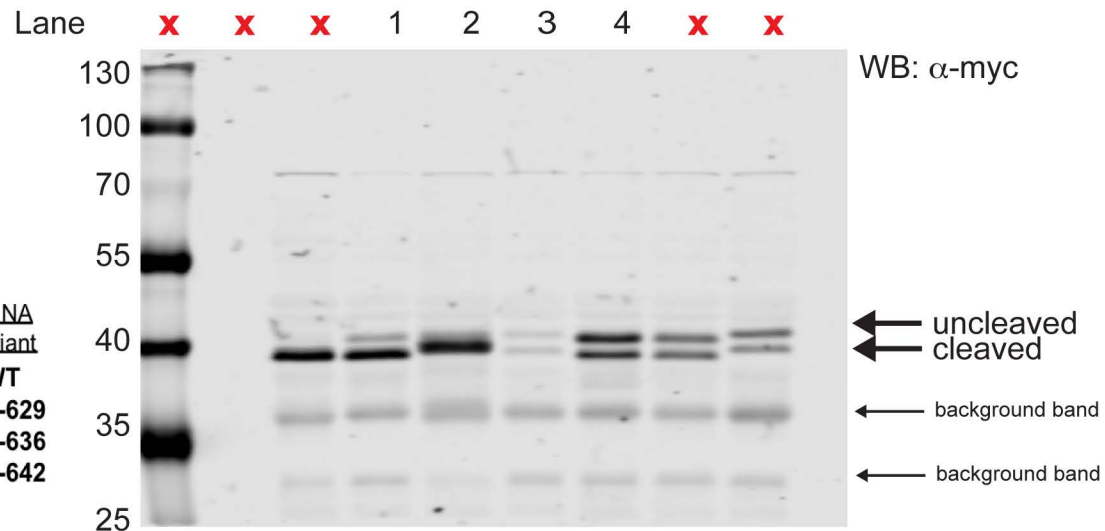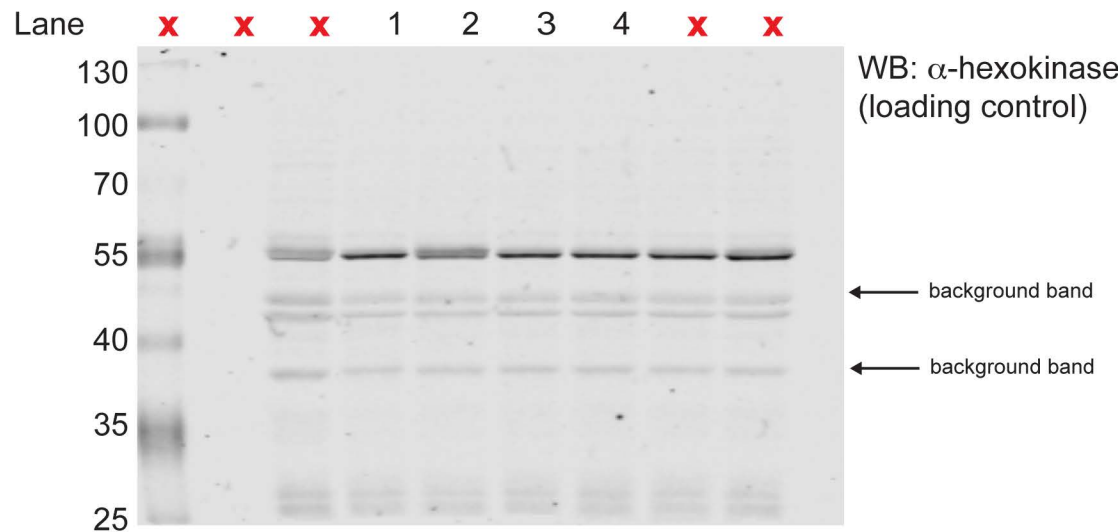

Fig. 6D

C

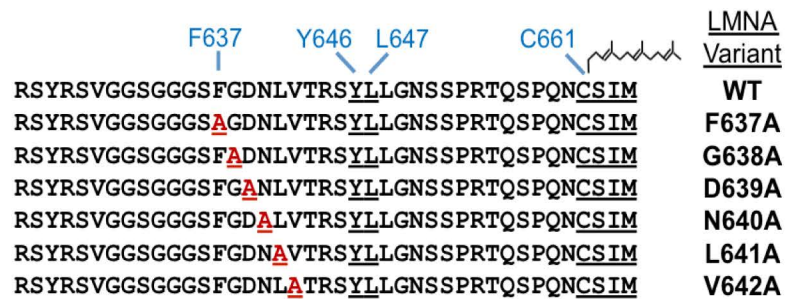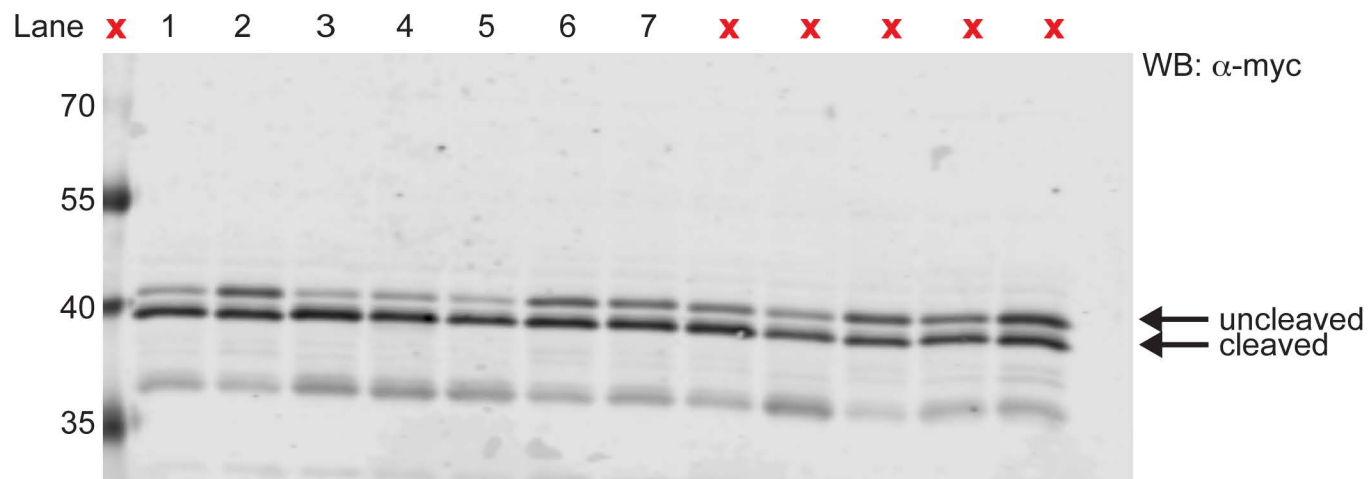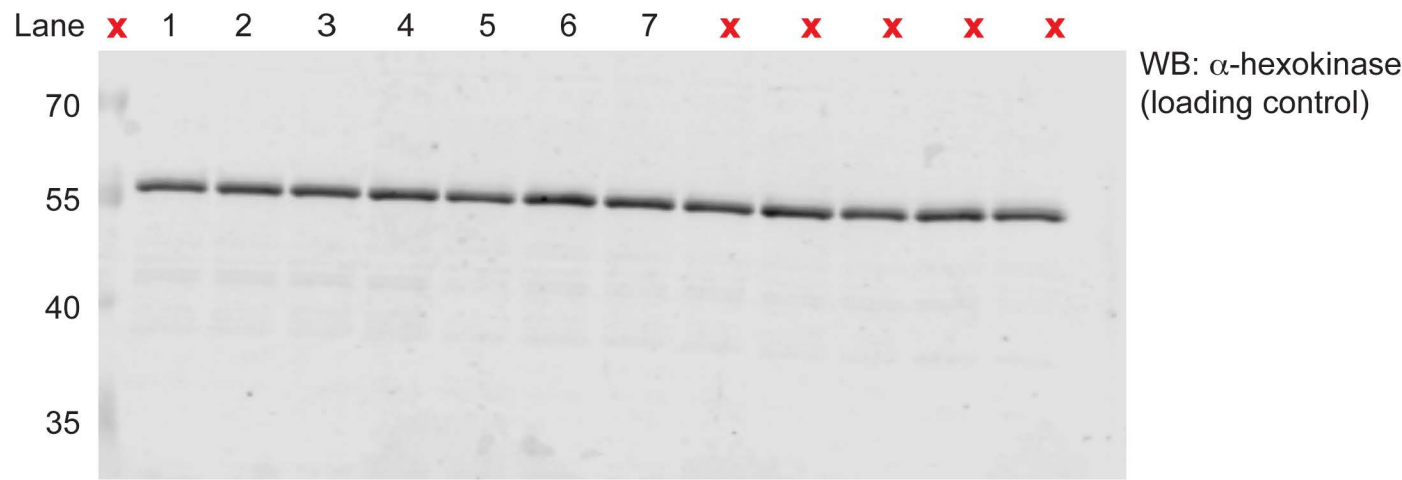

# Supplemental Fig.S1

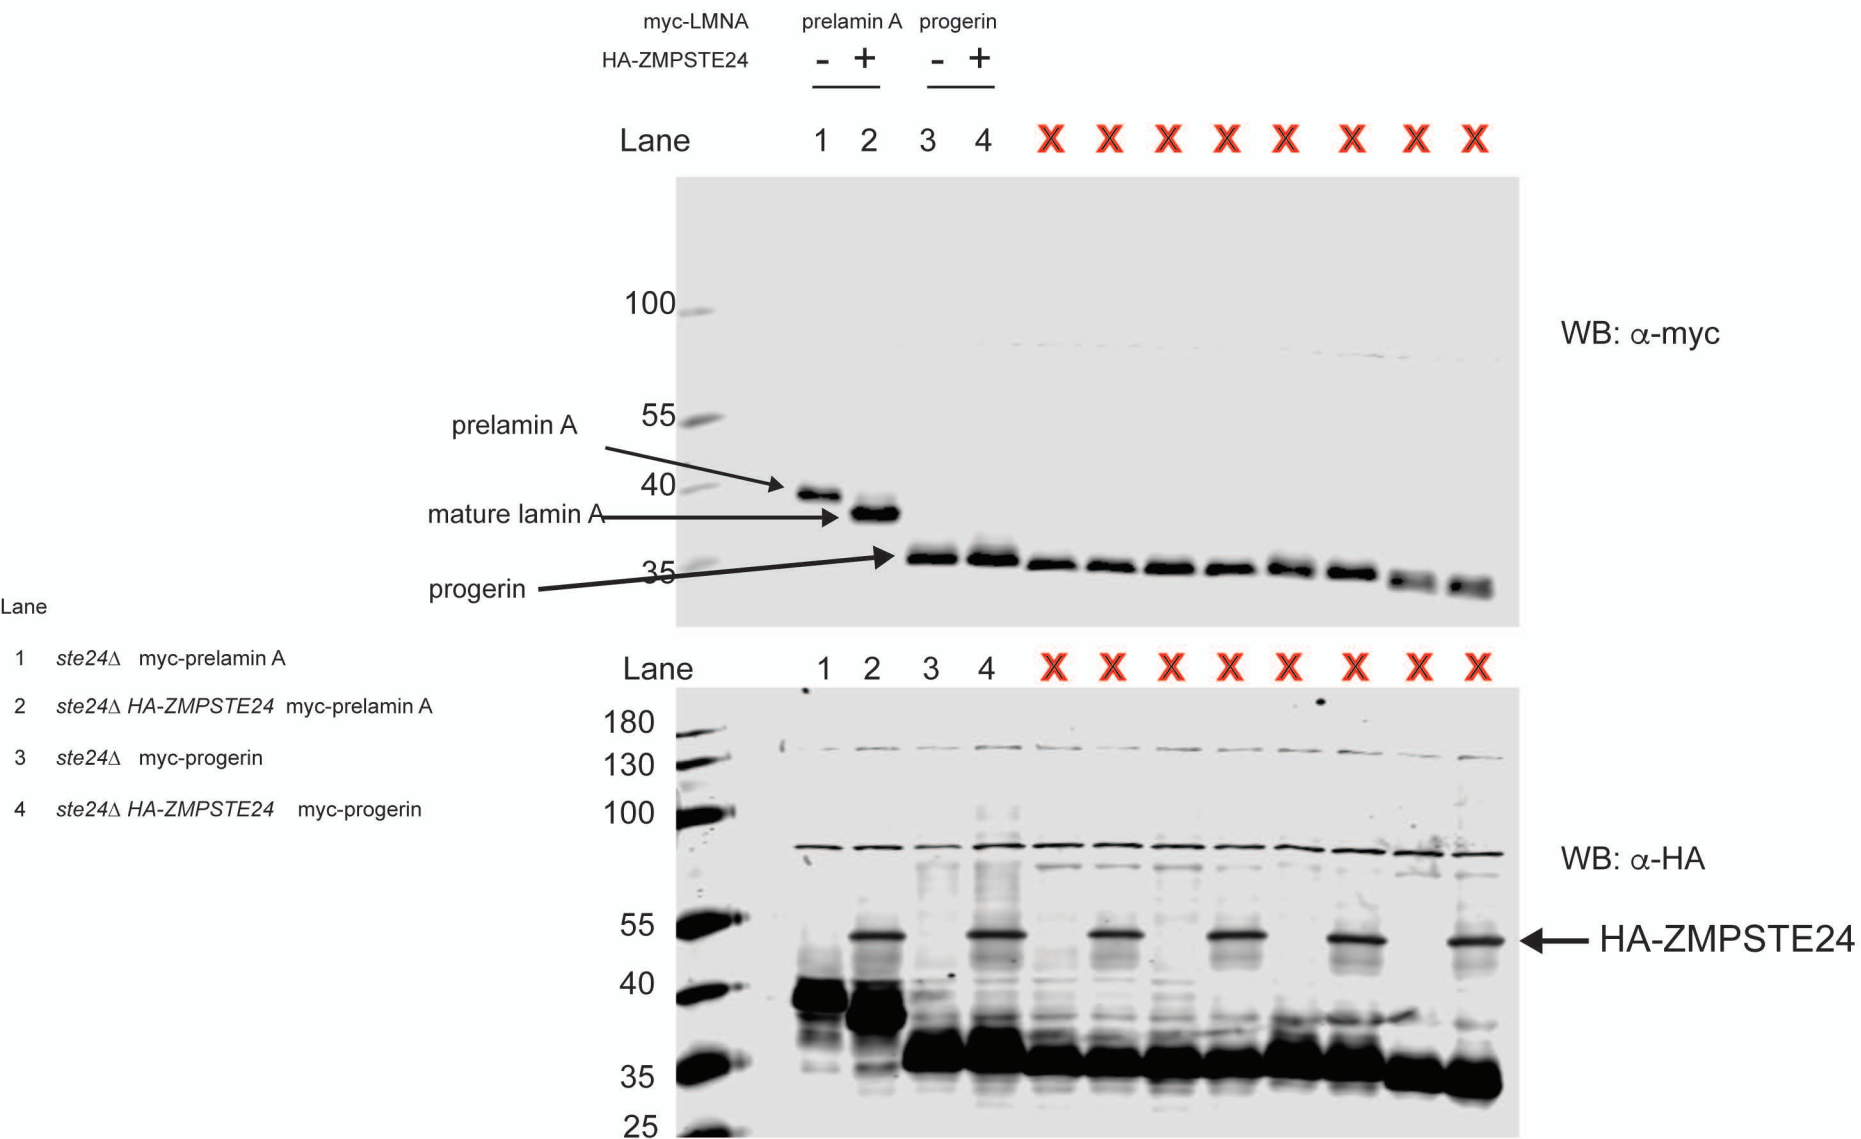

- SDS detergent lysates from strains SM4826 (*ste24* $\Delta$ ) and SM6303 (*ste24* $\Delta$  HA-ZMPSTE24) transformed with myc-prelamin A (pSM3371) or myc-progerin (pSM3638) were resolved by 10% SDS-PAGE, transferred to nitrocellulose (Biorad TransBlot Turbo), and proteins were detected using anti-myc and anti-HA monoclonal antibodies (described in M&Ms). The myc blot was first developed using Licor anti-mouse secondary antibodies and visualized using the Odyssey imaging platform (Licor). After the myc blot was scanned, anti-HA rat monoclonal antibodies were used to detect HA-ZMPSTE24 (arrow).
